# Supplementary material for: Nipple Aspirate Fluid at a Glance
Source: MDPI journal article supplement (doi:10.3390/cancers14010159), 2021-12-29

Figure S1

Timeline of Petrakis

1980s

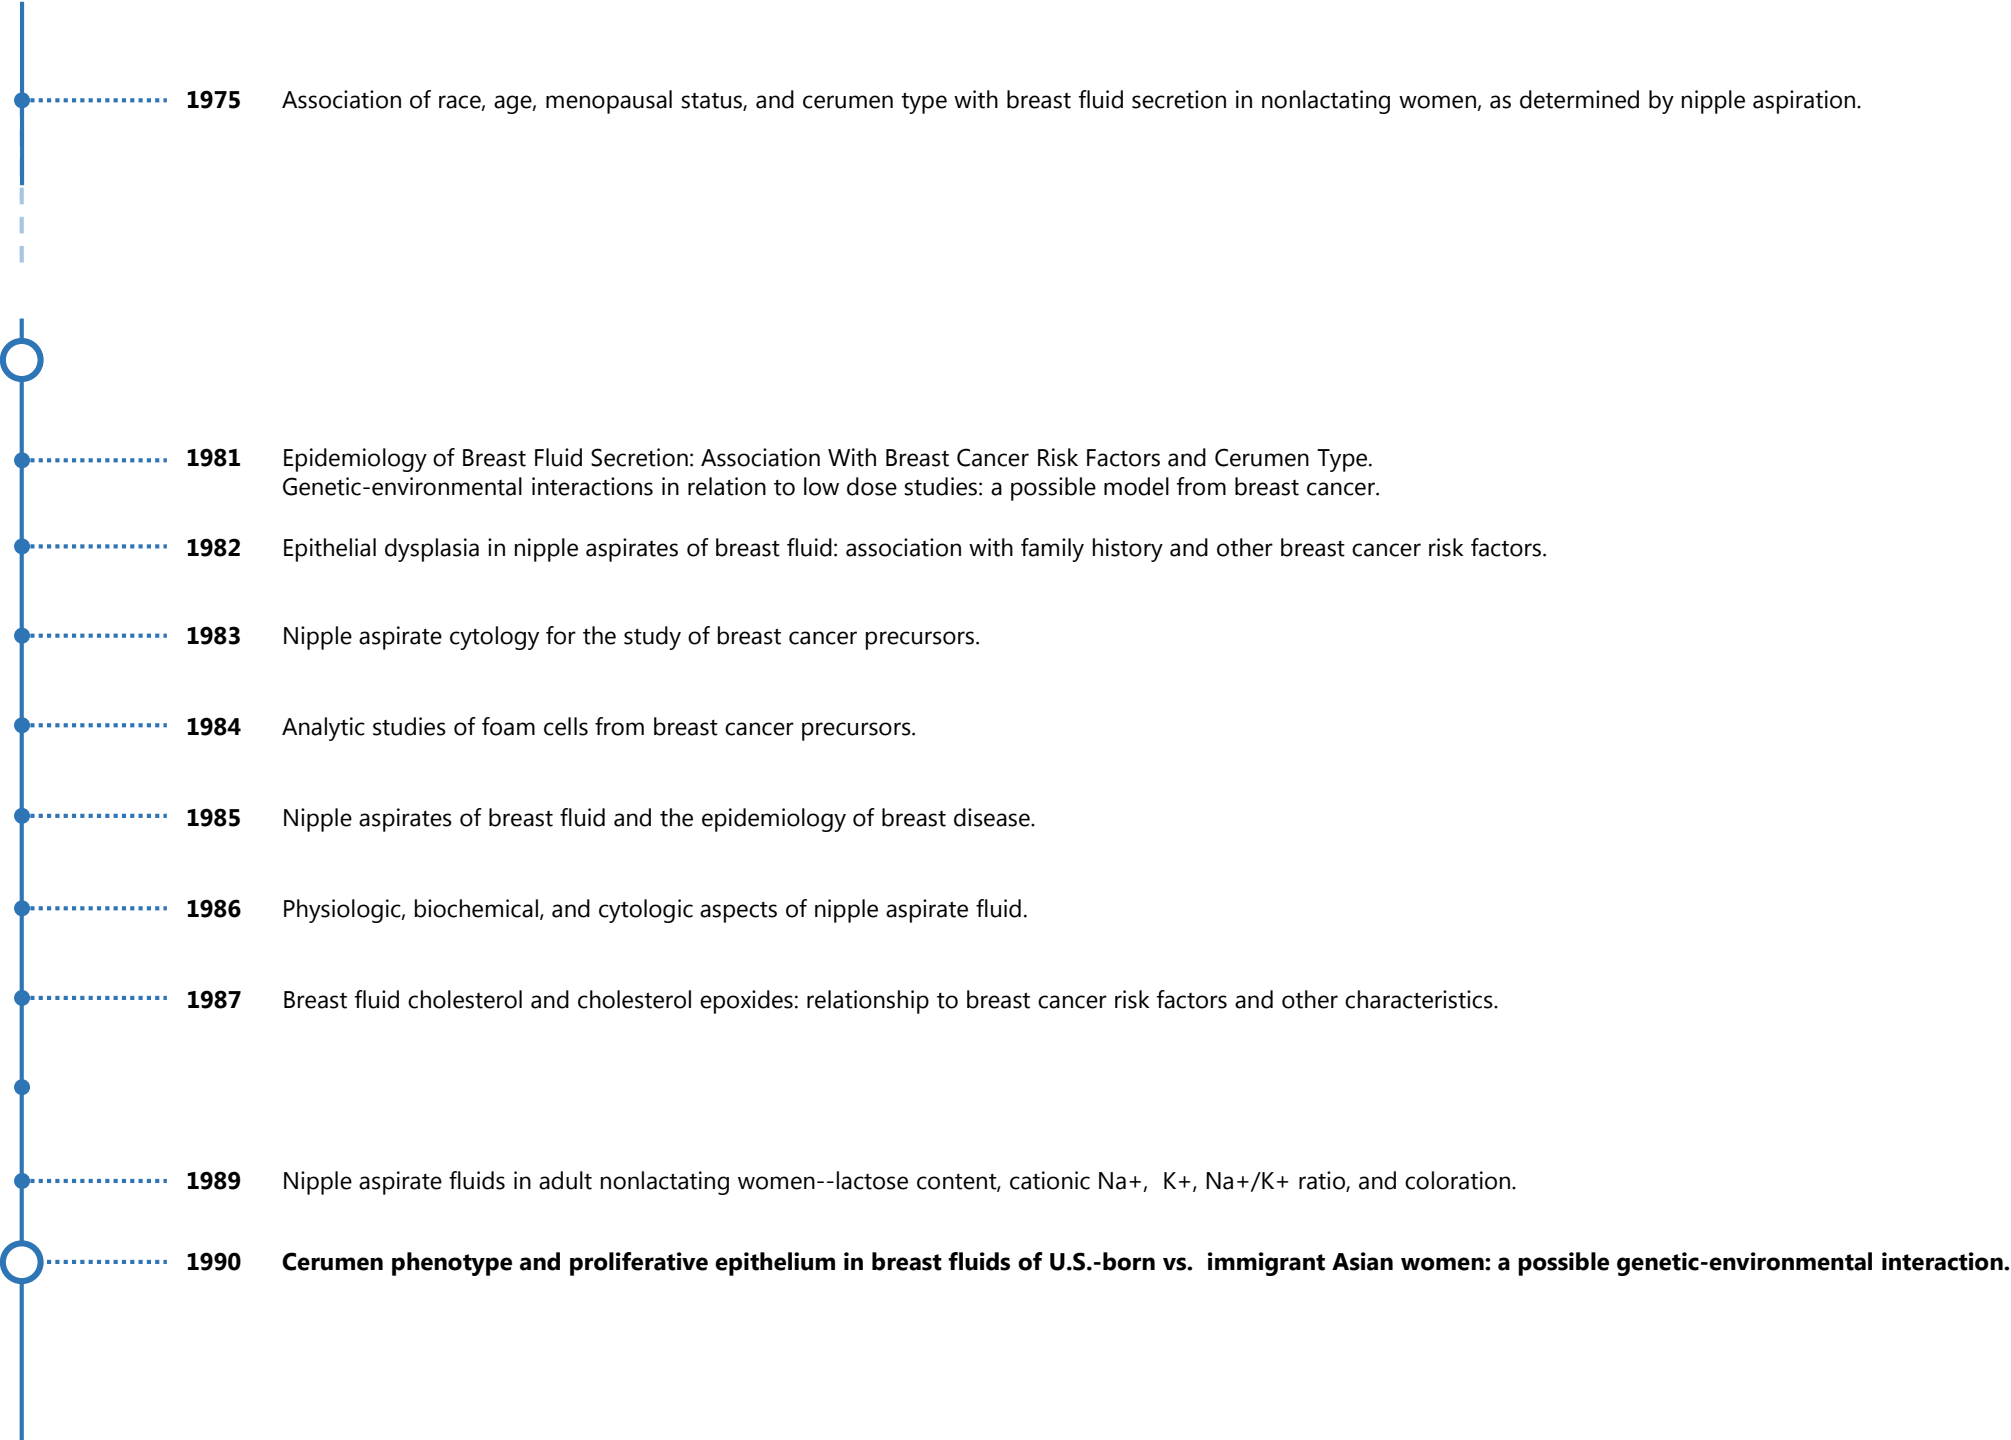

1990s

Figure S1

Timeline of Petrakis

2000s

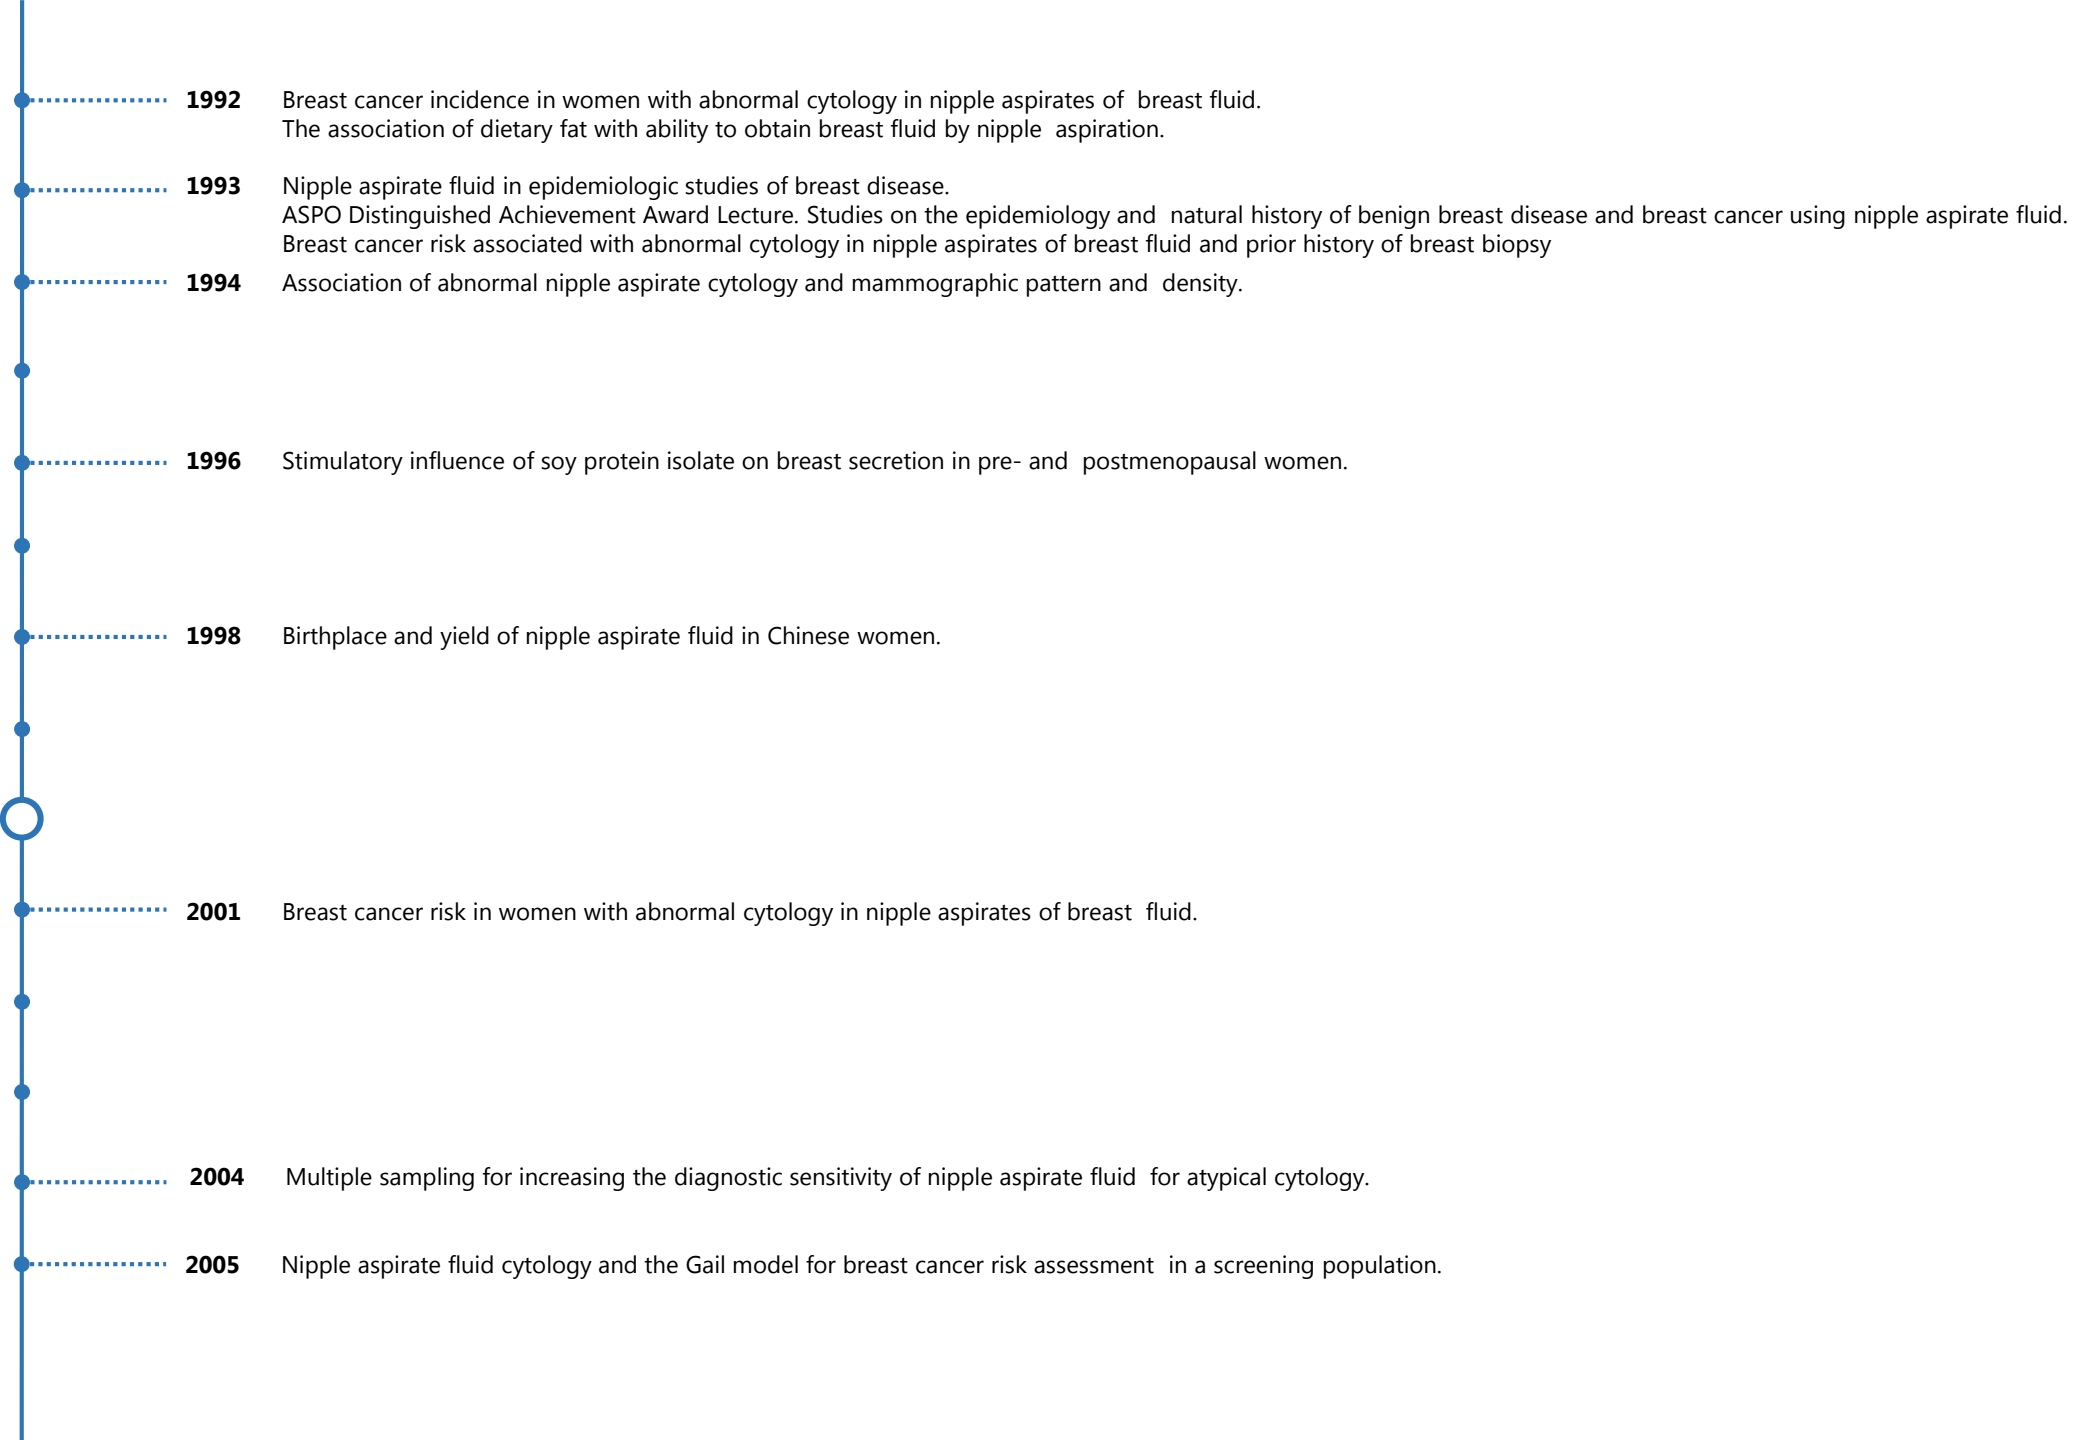

Figure S2

Timeline of Mannello

2000s

1999 Molecular forms and ultrastructural localization of prostate-specific antigen in nipple aspirate fluids.

2000 Biochemical and ultrastructural features of human milk and nipple aspirate fluids.

2003 Zymographic analyses and measurement of matrix metalloproteinase-2 and -9 in nipple aspirate fluids.

2007 Do nipple aspirate fluid epithelial cells and their morphology predict breast cancer development?  
The 8-epimer of prostaglandin F(2alpha), a marker of lipid peroxidation and oxidative stress, is decreased in the nipple aspirate fluid of women with breast cancer.

2008 Nipple aspirate fluids from women with breast cancer contain increased levels of group IIa secretory phospholipase A2.  
Increased levels of erythropoietin in nipple aspirate fluid and in ductal cells from breast cancer patients.  
Increased shedding of soluble fragments of P-cadherin in nipple aspirate fluids from women with breast cancer.  
Nutrients and nipple aspirate fluid composition: the breast microenvironment regulates protein expression and cancer aetiology.  
PA is upregulated by high dose celecoxib in women at increased risk of developing breast cancer.  
Analysis of the intraductal microenvironment for the early diagnosis of breast cancer: identification of biomarkers in nipple-aspirate fluids.

2009 Protein profile analysis of the breast microenvironment to differentiate healthy women from breast cancer patients.  
Intracrinology of breast microenvironment: hormonal status in nipple aspirate fluid and its relationship to breast cancer.  
Protein oxidation in breast microenvironment: Nipple aspirate fluid collected from breast cancer women contains increased protein carbonyl concentration.

2010s

2010 Detection of superoxide dismutase-1 in nipple aspirate fluids: a reactive oxygen species-regulating enzyme in the breast cancer microenvironment.  
Iron-binding proteins and C-reactive protein in Nipple Aspirate Fluids: role of Iron-driven inflammation in breast cancer microenvironment?

2011 Aluminium and human breast diseases.  
Analysis of aluminium content and iron homeostasis in nipple aspirate fluids from healthy women and breast cancer-affected patients.

Figure S2

Timeline of Mannello

2020s

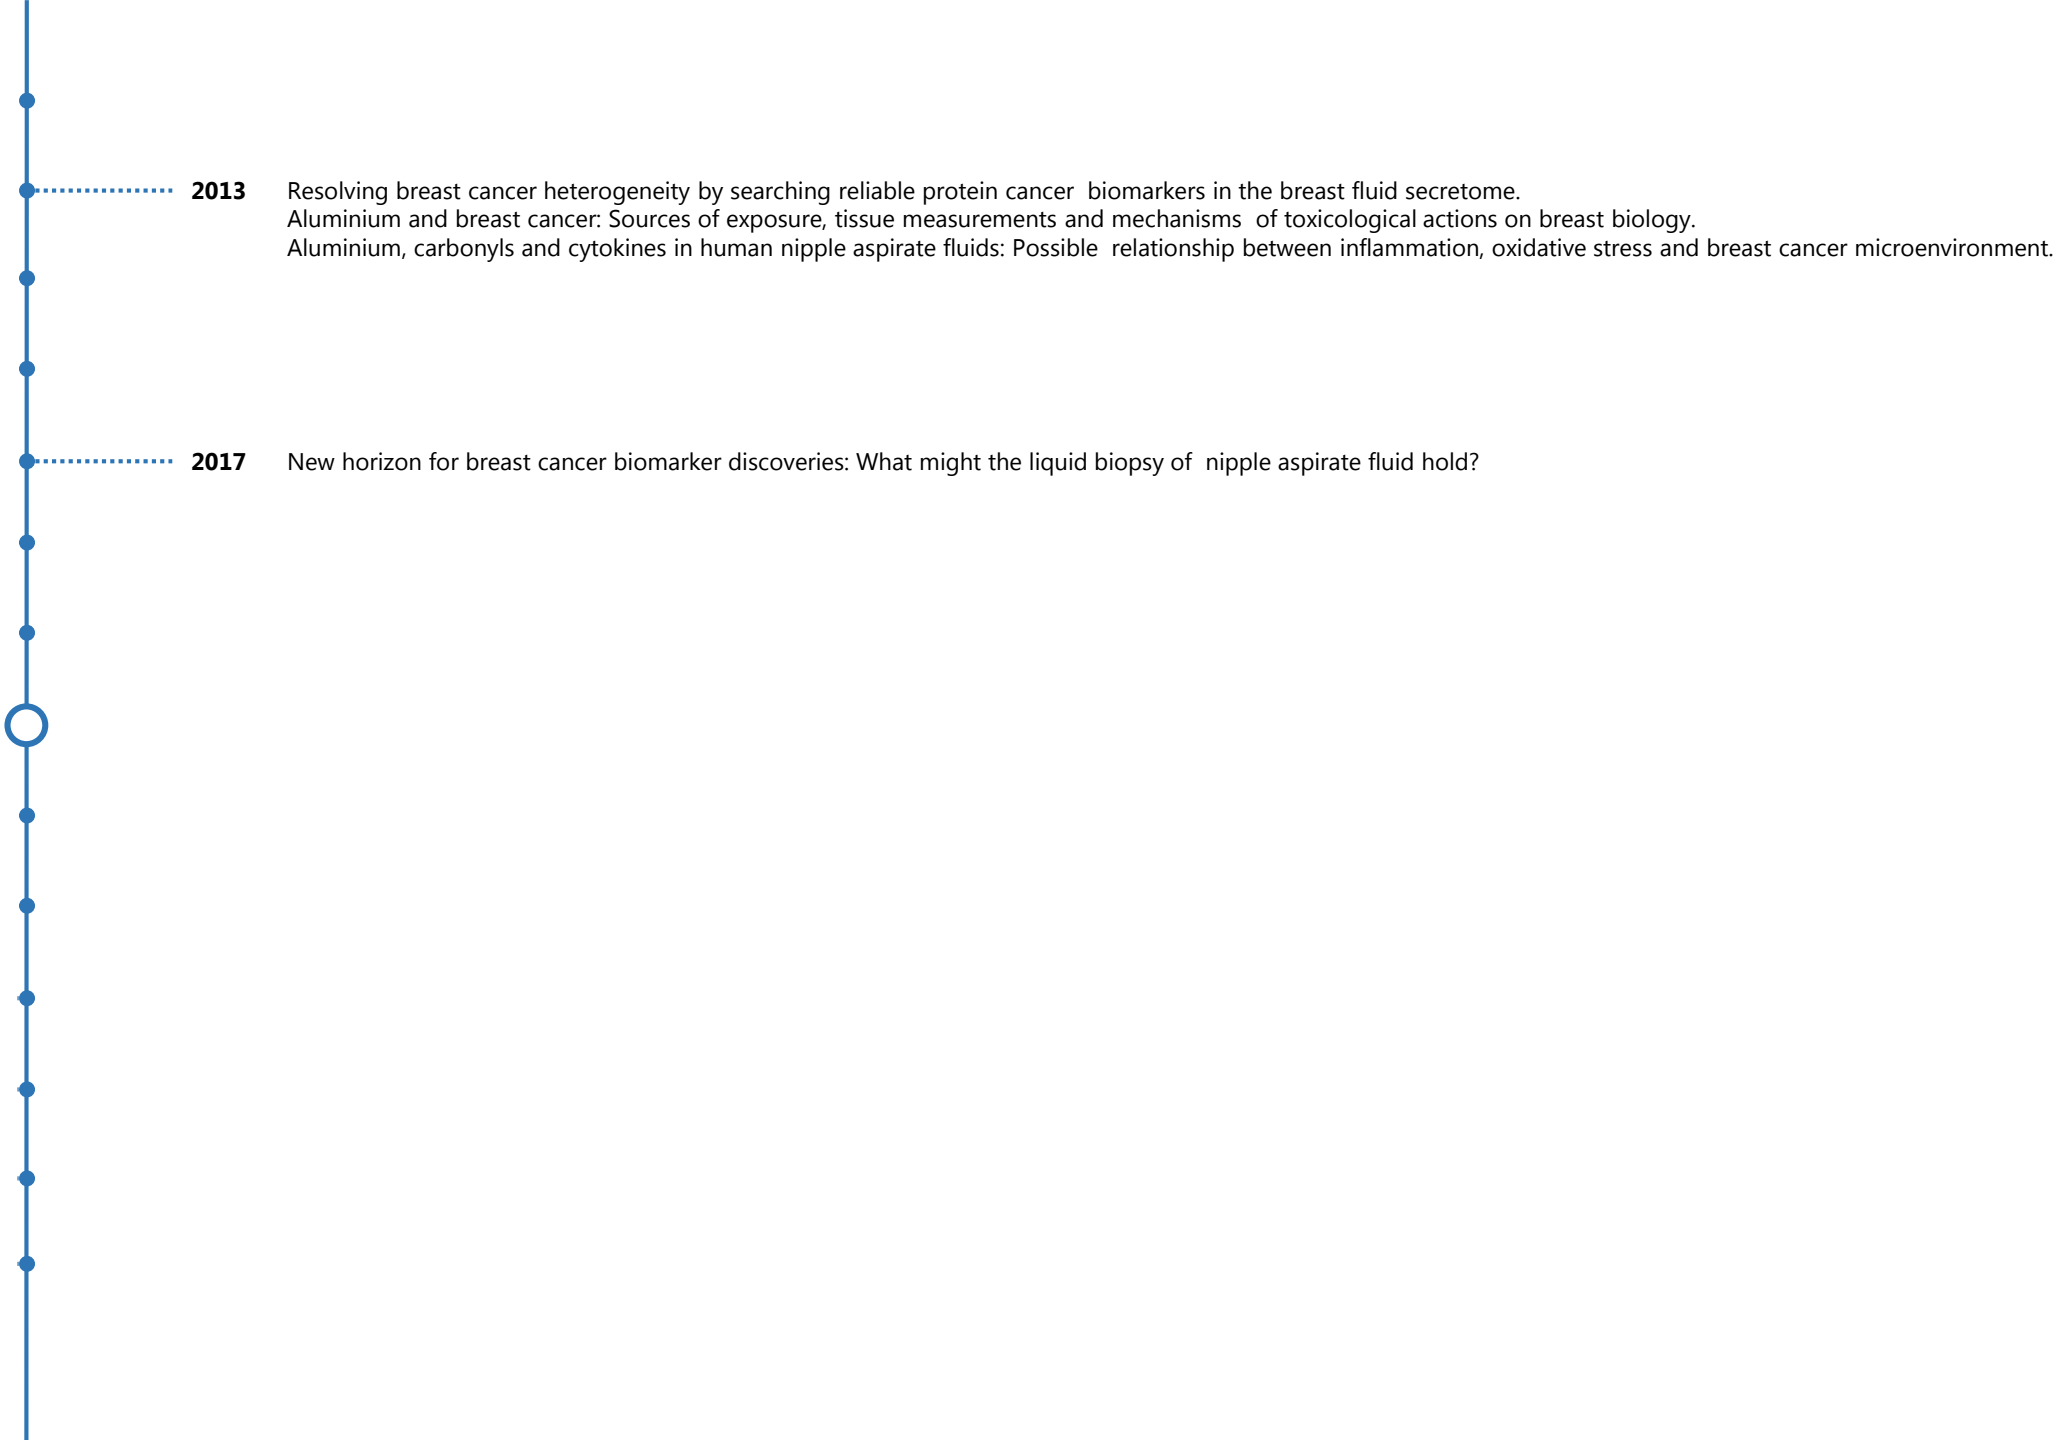

Figure S3

Timeline of Sauter

2000s

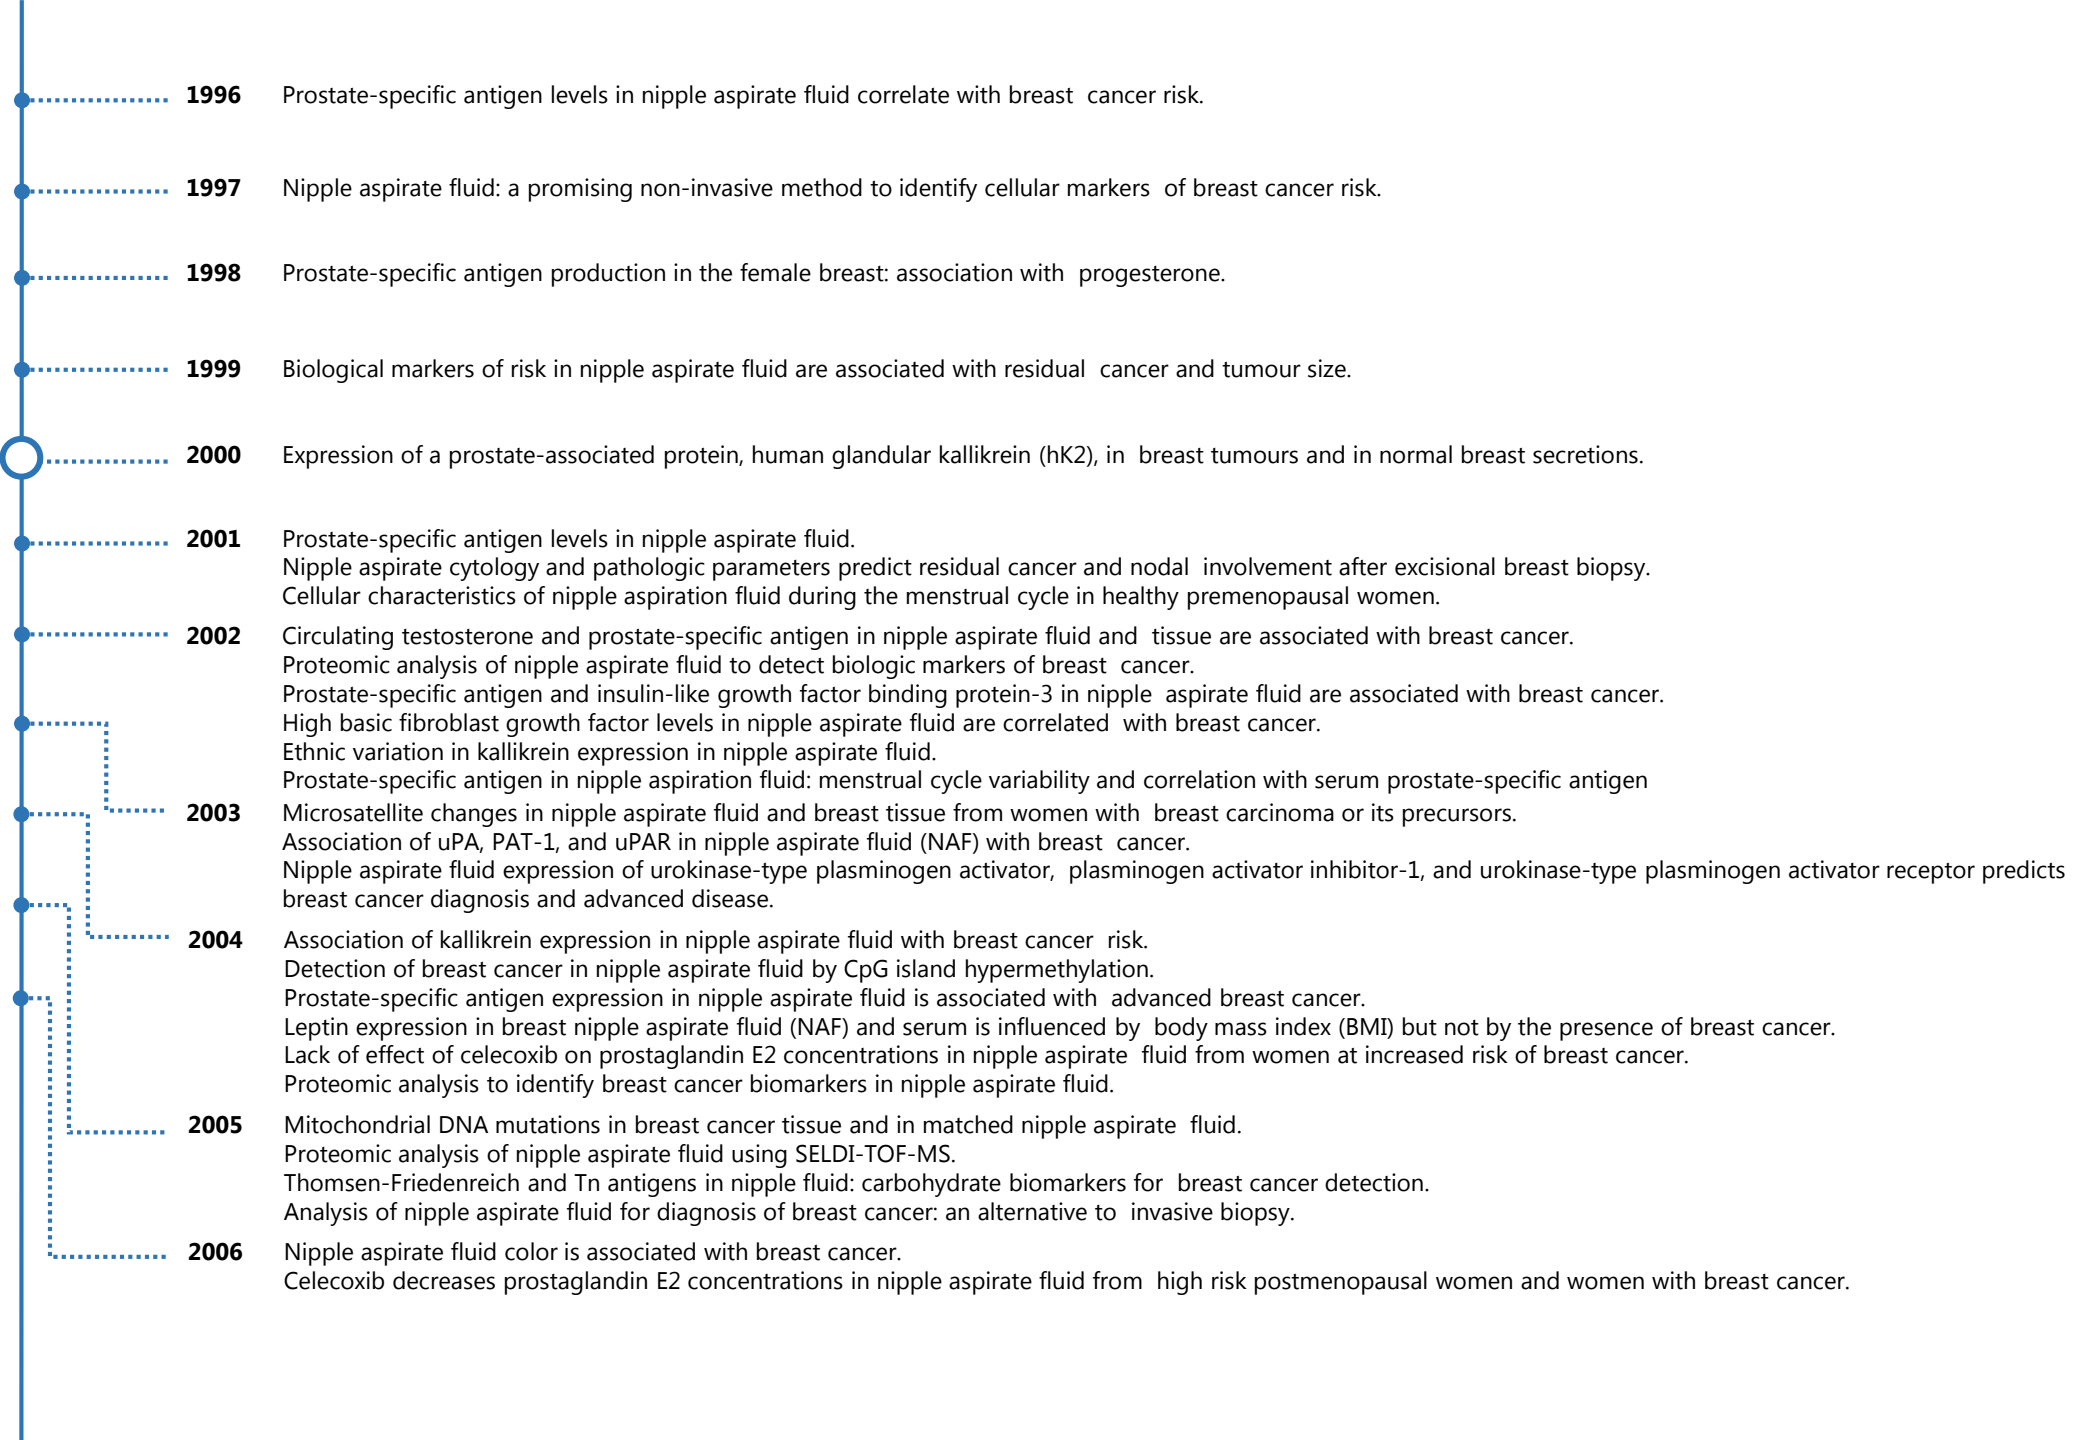

Figure S3

Timeline of Sauter

2010s

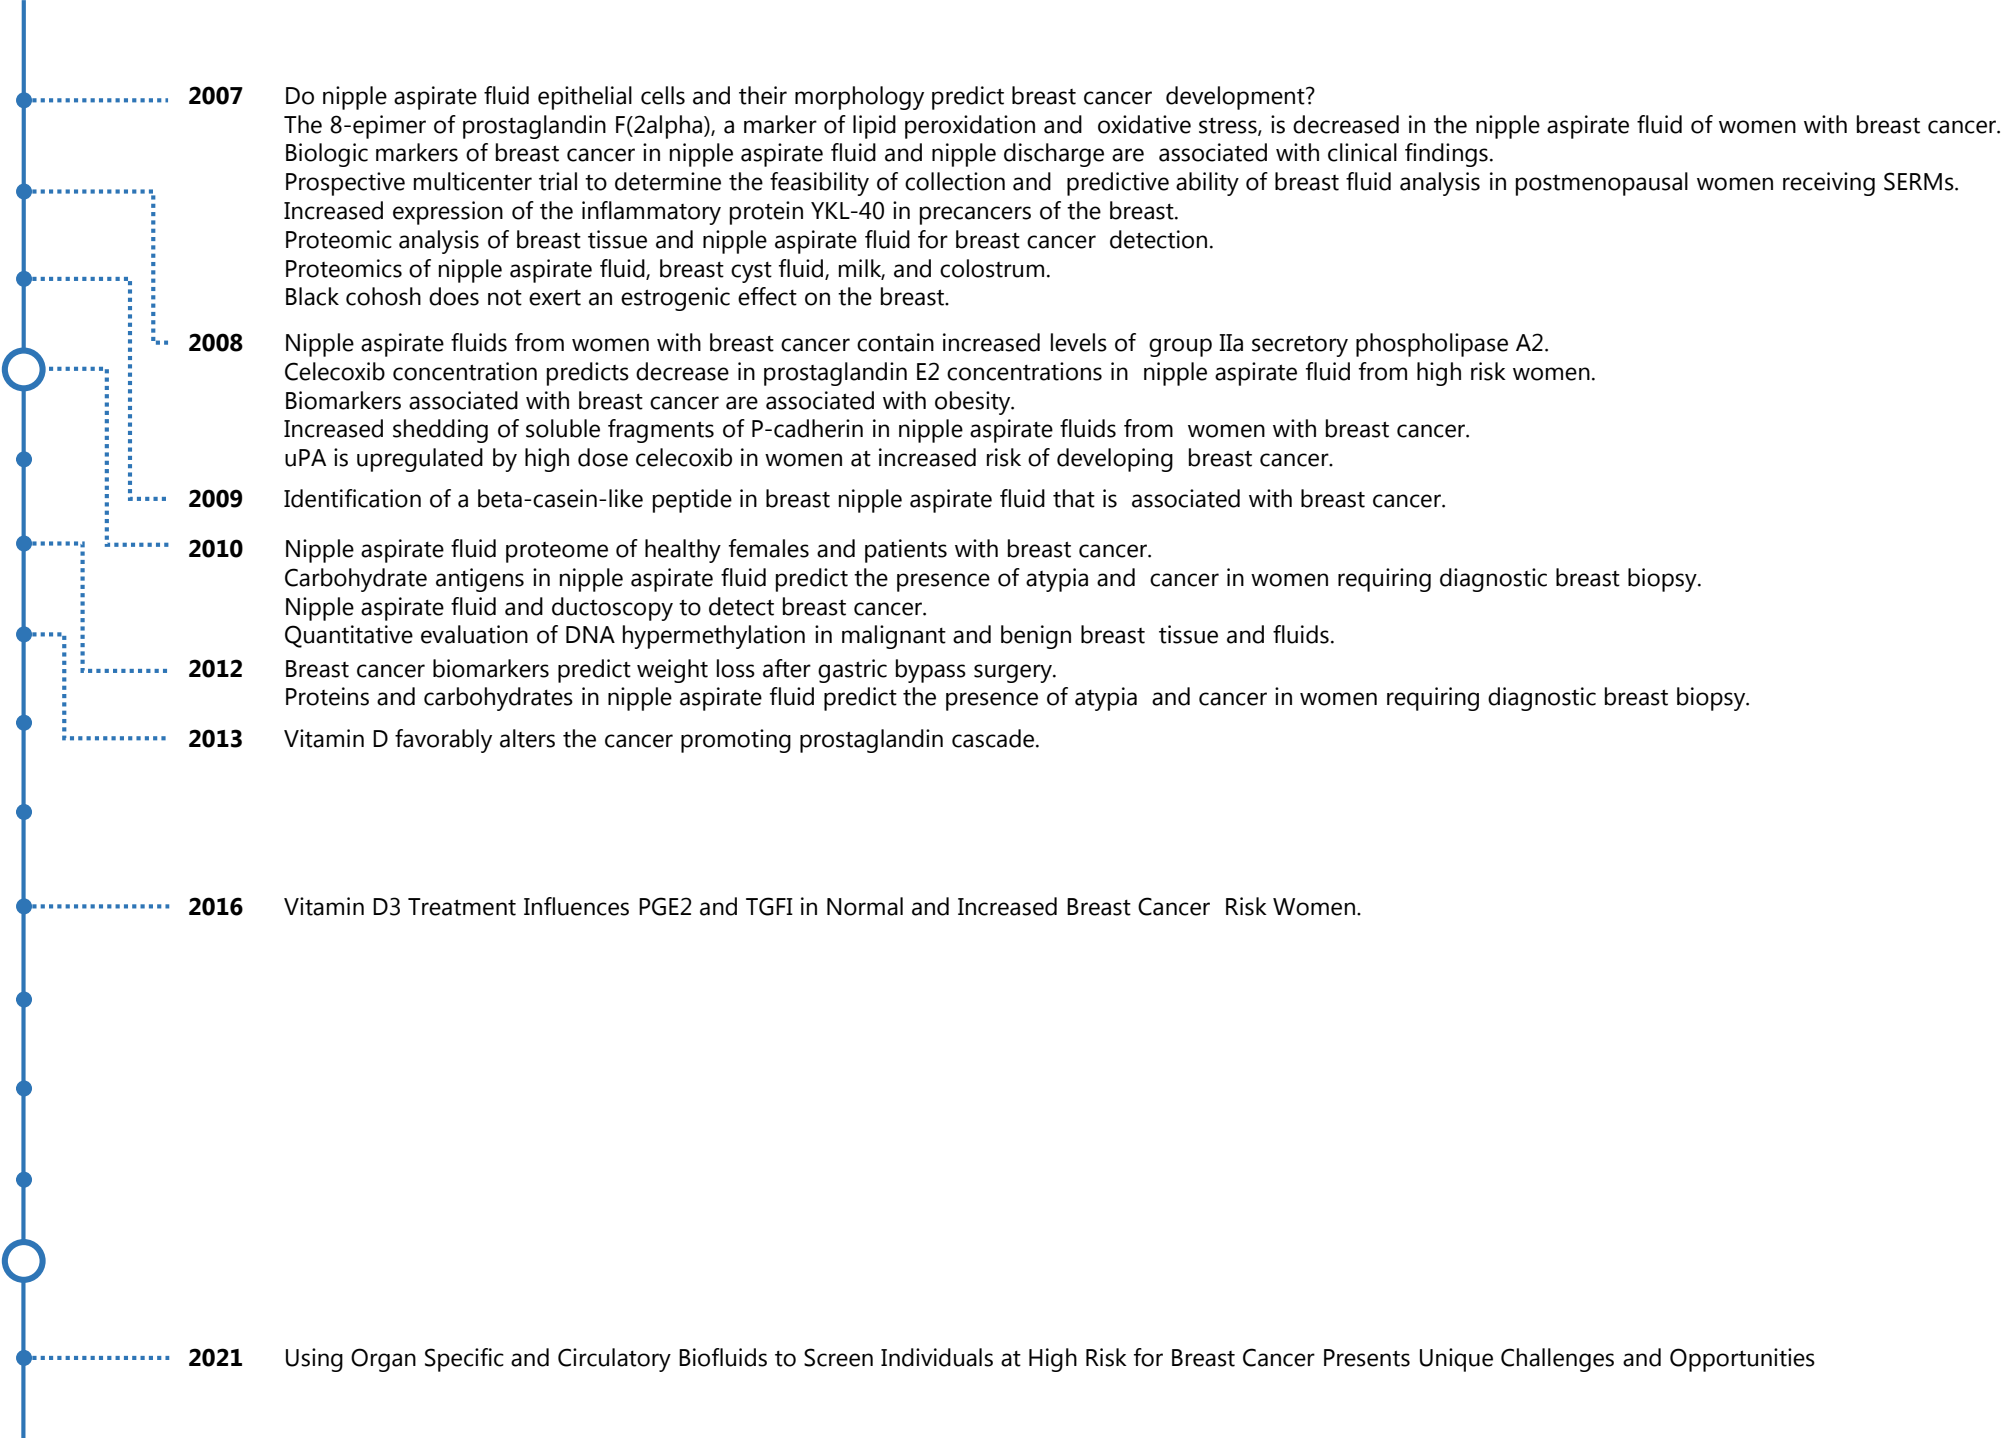

Figure S4

Timeline of Van Diest and Van der Wall

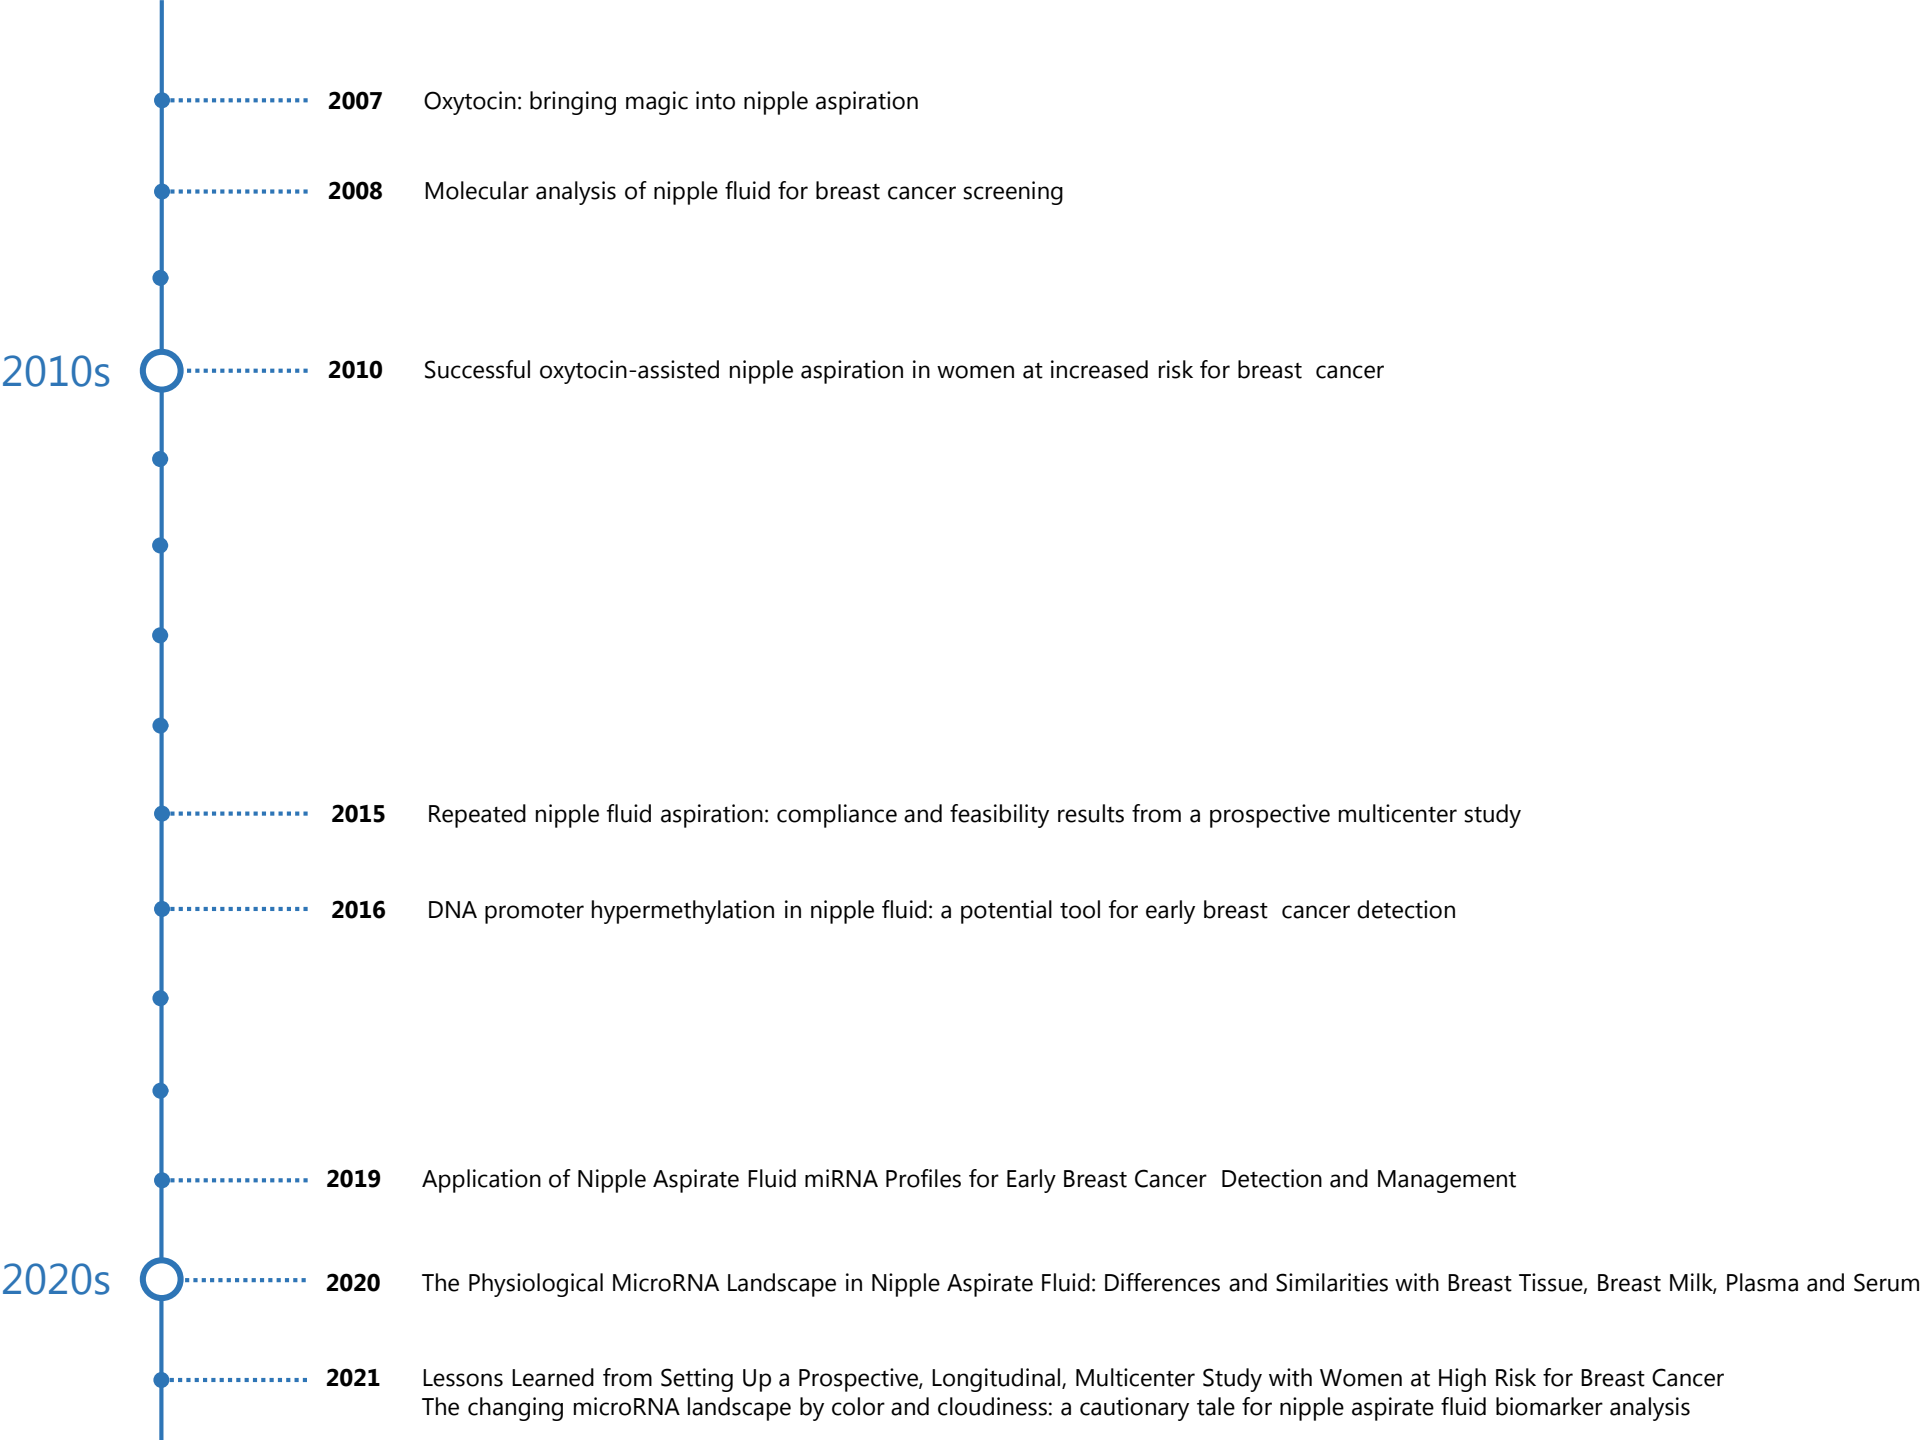

Supplement: s1 [file s1]
